# Supplementary material for: AlphaFold predictions of fold-switched conformations are driven by structure memorization
Source: PubMed Central journal article supplement (PMC11344769; doi:10.1038/s41467-024-51801-z), 2024-08-24
Supplement: 41467_2024_51801_MOESM3_ESM.pdf [file 41467_2024_51801_MOESM3_ESM.pdf]

## Description of Additional Supplementary Files

**File Name:** Supplementary Data 1

**Description:** The dataset of 92 fold-switchers on which AF2 was benchmarked. PDB IDs corresponding to both conformations, as well as the amino acid sequence of the fold-switching regions of each protein, are listed.

**File Name:** Supplementary Data 2

**Description:** Successful predictions of fold-switchers using each AF2 implementation. Reports from each implementation are shown on individual pages of the Excel spreadsheet.

**File Name:** Supplementary Data 3

**Description:** List of biomolecules included in all AF3 runs.

**File Name:** Supplementary Data 4

**Description:** Fold-switchers identified with different pLDDT cut-offs.

**File Name:** Supplementary Data 5

**Description:** Fold-switchers identified with different pTM cut-offs.

**File Name:** Supplementary Data 6

**Description:** Ranking of targets by Easy and Complex

**File Name:** Supplementary Data 7

**Description:** Number of models generated by AF-cluster for each RfaH variant.
